# Supplementary material
Source: publisher figshare collection journal article supplement (https://sage.figshare.com/ndownloader/files/13102754)
Supplement: Supplementary file 1 [file 13102754]

## **I.C.A.R.E: Communicating for Impact: Survey Questions**

*All questions were presented with a 4 point Likert scale (Strongly Agree/Agree/Disagree/Strongly Disagree)*

Before this course, I thought it would be a valuable use of my time

After this course, I believe it was a valuable use of my time

Before this course, I thought it would be relevant to my practice

After this course, I believe it was relevant to my practice

Before this course, I thought it would teach feasible skills I could use in my practice

After this course, I thought it taught feasible skills I can use in my practice

Before this course, I had knowledge of a clear framework I could use for communicating with patients

After this course, I have knowledge of a clear framework I can use for communicating with patients

Before this course, I had a strong skill set of tools I could use to communicate with patients

After this course, I have a strong skill set of tools I can use to communicate with patients

Before this course, I understood the importance of communication with patients

After this course I understand the importance of communication with patients

Please list one thing we should keep doing or was particularly effective:

Please list one thing we should stop doing or could do better:
